# Supplementary material for: Microfluidic device for multiplexed detection of fungal infection biomarkers in grape cultivars
Source: Royal Society of Chemistry journal article supplement (doi:10.1039/d0an01753a), 2020-01-01
Supplement: d0an01753a1.pdf [file d0an01753a1.pdf]

1 **Microfluidic device for multiplexed detection of fungal infection biomarkers in**  
2 **grape cultivars**

3 **Eduardo J.S.Brás<sup>1,2</sup>, Ana Margarida Fortes<sup>3</sup>, Teresa Esteves<sup>2,4</sup> Virginia Chu<sup>1</sup>, Pedro**  
4 **Fernandes<sup>2,5</sup>, João Pedro Conde<sup>1,4\*</sup>**

5 <sup>1</sup> Instituto de Engenharia de Sistemas e Computadores – Microsistemas e Nanotecnologias  
6 (INESC MN)

7 <sup>2</sup> IBB – Institute for Bioengineering and Biosciences, Instituto Superior Técnico, Universidade  
8 de Lisboa, Lisbon, Portugal

9 <sup>3</sup>BioISI, Faculdade de Ciências de Lisboa, Universidade de Lisboa , Lisbon, Portugal

10 <sup>4</sup> Department of Bioengineering, Instituto Superior Técnico, Universidade de Lisboa, Lisbon,  
11 Portugal

12 <sup>5</sup>DREAMS and Faculty of Engineering, Universidade Lusófona de Humanidades e Tecnologias,  
13 Lisbon, Portugal

14 \*Corresponding author: joao.conde@tecnico.ulisboa.pt

15

## 16 **S1 – Jasmonic acid – BSA conjugation**

17 In this work, a conjugation between jasmonic acid (JA) and bovine serum albumin (BSA) is performed in  
18 order to immobilize JA on the microbead surface. To confirm the conjugation of JA to the BSA molecules,  
19 both were incubated at 5 g/L with the silica microbeads for 1h under constant agitation. Then, both  
20 functionalized beads were packed into a micro-column and the labelled  $\alpha$ -JA antibody was injected for 5  
21 min at a concentration of 50 mg/L at a flow rate of 1  $\mu$ L/min, followed by a 1 min washing step with PBS  
22 at 5  $\mu$ L/min. The results obtained are presented in Figure S1.

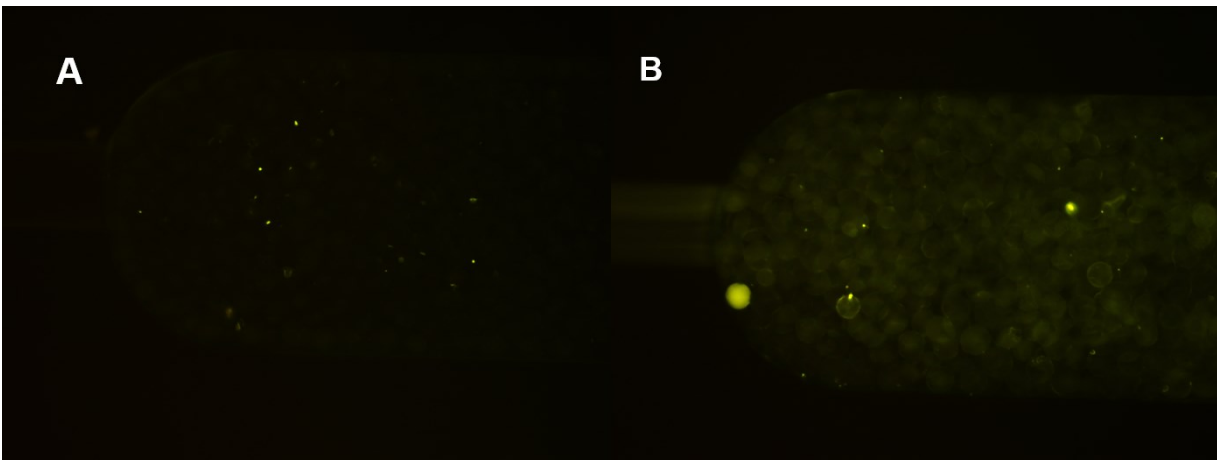

Figure S1 – Results obtained concerning the interaction between the  $\alpha$ -JA antibody with microbeads functionalized with BSA (A) and JA-BSA (B). Pictures were enhanced for visualization purposes.

23

24 The results presented demonstrate that the antibody does not interact with the BSA functionalized beads,  
25 however it does attach to the JA-BSA beads. These results also motivated the use of BSA as the blocking  
26 agent of the assay.

27

## 28 **S1 – Photosensor Characterization**

29

30 In this work, a thin-film amorphous silicon photosensor array is used as an optical transducer for the  
31 different detection methods used. The active layer of the sensor is a 200  $\mu$ m x 200  $\mu$ m and is composed  
32 of a 500 nm thick layer of intrinsic hydrogenated amorphous silicon. The deposition conditions for the film  
33 using an Oxford Plasma Pro 100 were: Temperature= 300  $^{\circ}$ C, Chamber Pressure= 350 mTorr, RF Power=  
34 10 W, SiH<sub>4</sub> flow rate= 25 sccm, H<sub>2</sub> flow rate= 10 sccm, Deposition time= 21 min. The *I*-*V* curve as well as

35 the photoresponse of the sensors at the wavelengths of interest for the absorbance assays are shown in  
36 Figure S2.

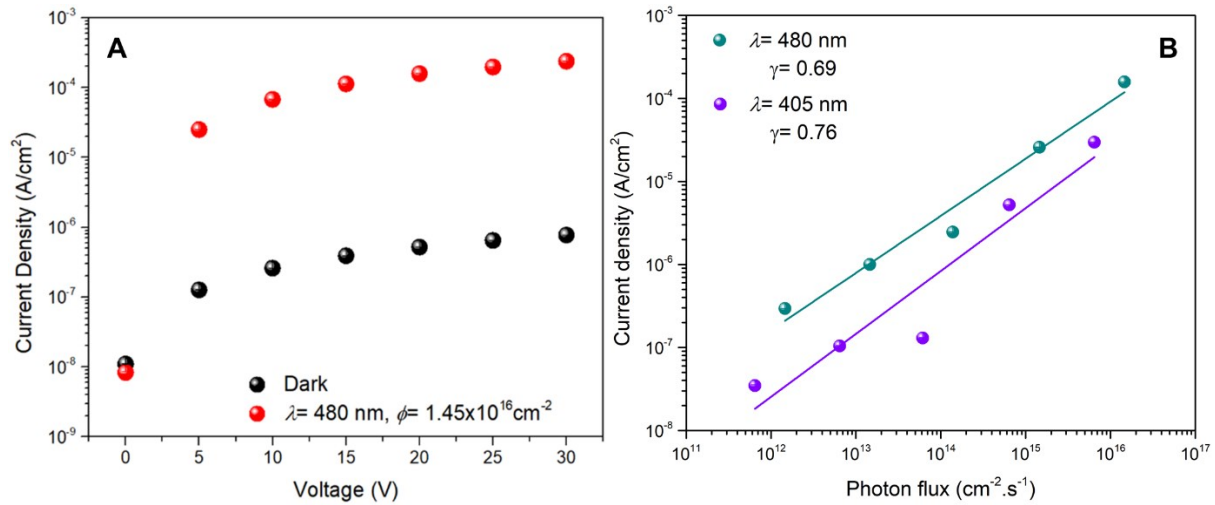

Figure S2– (A) *I*-*V* curves in the dark and in a condition of high light. (B) Photoresponse curves for the wavelengths of interest for the detection of SA ( $\lambda= 405$  nm) and AzA ( $\lambda= 480$  nm). The slope of the fit,  $\gamma$ , is correlated to the generation rate of the sensor.

37

38 For the detection of the fluorescent signal in the jasmonic acid assay, it is necessary to block out the  
39 excitation light at  $\lambda= 405$  nm, while maximizing the transmission of the emitted light at  $\lambda= 540$  nm. To do  
40 this, a 1.5  $\mu\text{m}$  thick silicon carbide high-pass filter was deposited on top of the sensor for this assay. The  
41 transmission curve of the filter is presented in Figure S3.

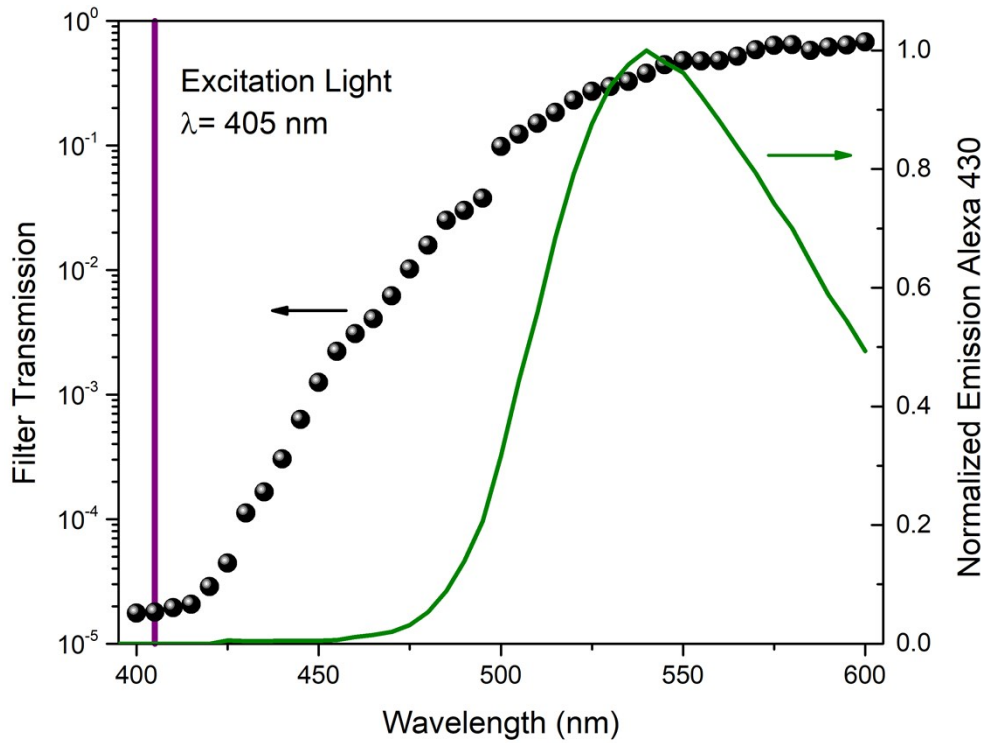

Figure S3 – Overlap of the silicon carbide filter transmission profile (Black dots) with the emission profile of the Alexa 430<sup>®</sup> fluorophore provided by the manufacturer (Green line). The excitation light source used was a  $\lambda = 405 \text{ nm}$  laser.

42 To confirm that the a-SiC:H layer did not hinder the performance of the sensor, the photoresponse at  $\lambda =$   
 43 540 nm, which is the emission maximum of the Alexa 430<sup>®</sup> fluorophore, was performed and is presented  
 44 in Figure S4.

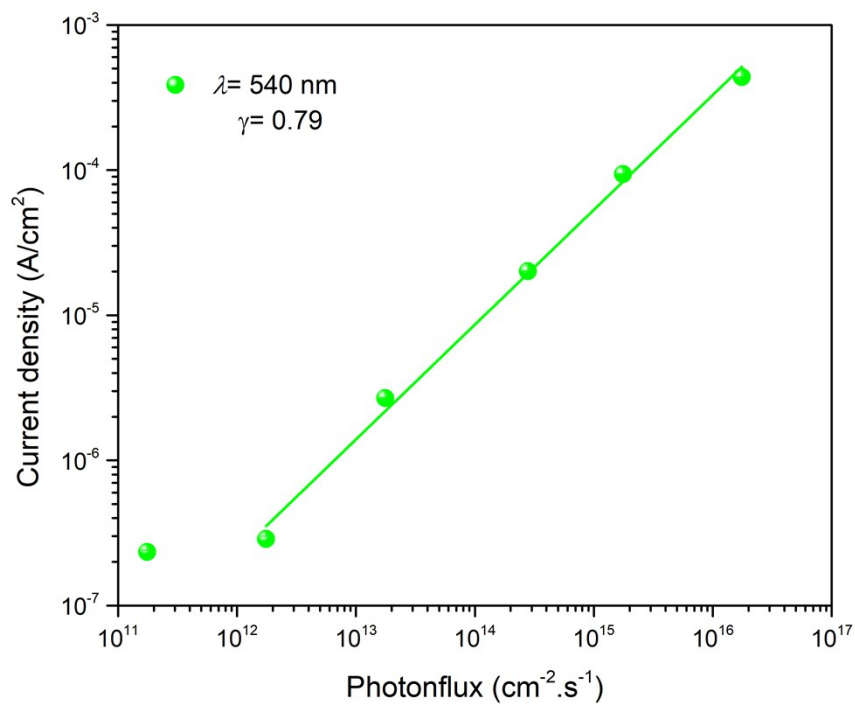

Figure S4 - Photoresponse curve for the wavelength of interest for the detection of JA ( $\lambda = 540$  nm) using the a-SiC:H-filtered photoconductor. The slope of the fit,  $\gamma$ , is correlated to the generation rate of the sensor

45

46

### 47 **S3 – SA Assay Absorbance Behavior**

48 To determine the optimal wavelength for the detection of SA through the complexation reaction with the  
49  $\text{TiO}_2$  nanoparticles, the absorbance spectrum of free SA, free  $\text{TiO}_2$  and the product of reaction were  
50 measured and are presented in Figure S5.

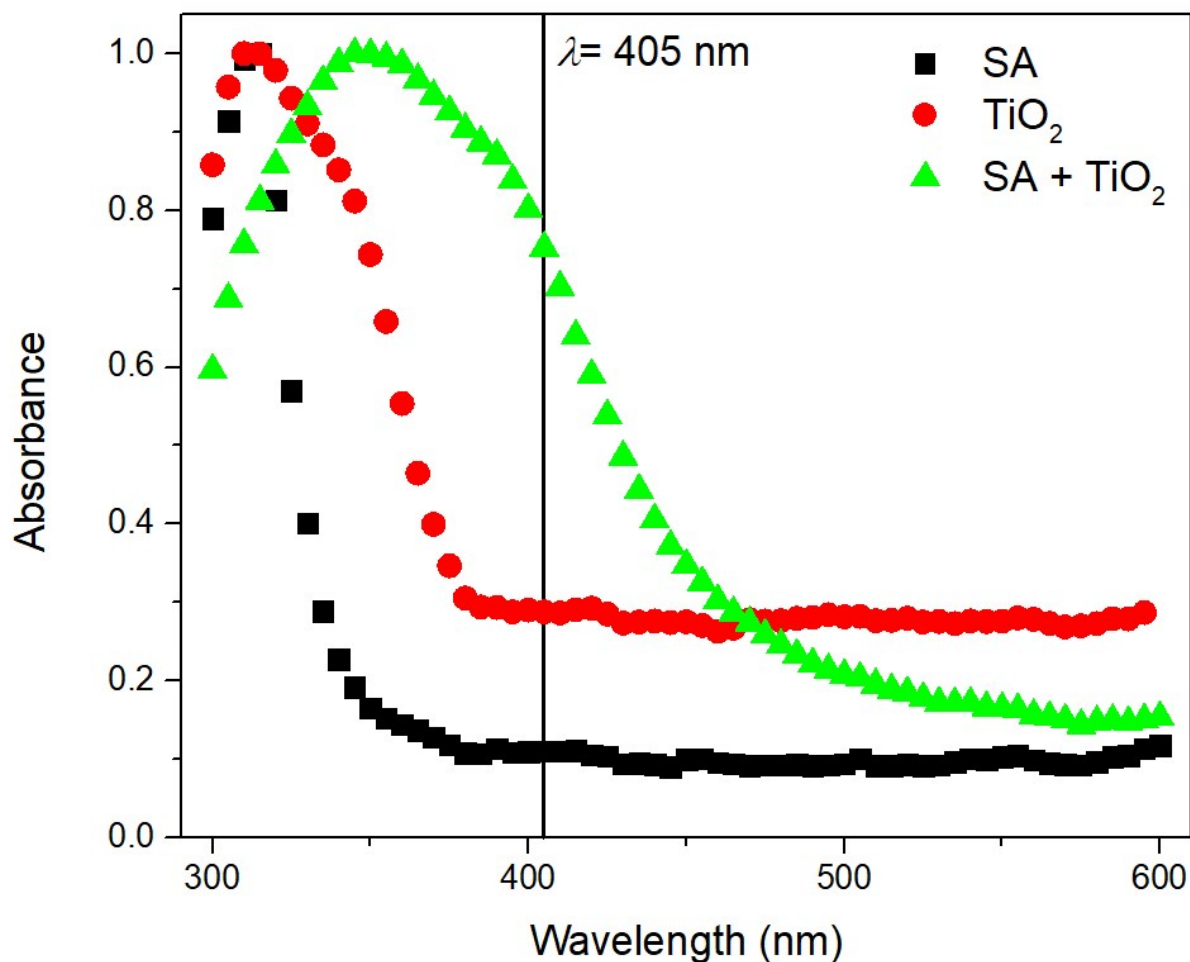

Figure S5 – Absorbance spectra of free SA (black), free TiO<sub>2</sub> nanoparticles (red) and the product of the reaction (green). The shift in absorbance from the UV range into the visible due to the reaction is visible here. The vertical line at  $\lambda = 405$  nm represents the chosen wavelength for the assay.

51

## 52 S4 – TiO<sub>2</sub> Interference assays

53 Since the assay for the detection of AzA is directly downstream to the chamber for the detection of SA,  
 54 there is the possibility that the TiO<sub>2</sub> nanoparticles could seep through the first chamber and interfere with  
 55 the detection of AzA. To determine if any interferences were present, known concentrations of AzA and  
 56 TiO<sub>2</sub> were mixed together and tested using the AzA enzymatic assay. These results are presented in Figure  
 57 S6.

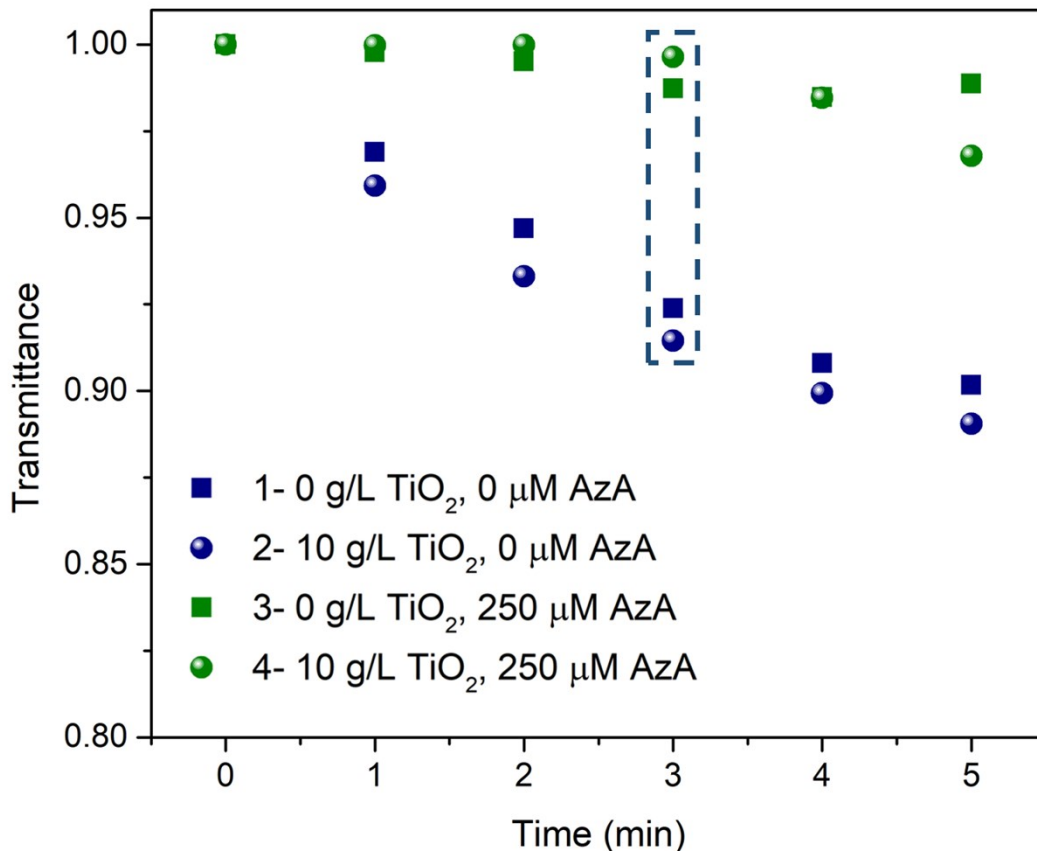

Figure S6 – Assays performed to determine the existence of interference from the TiO<sub>2</sub> nanoparticles on the enzymatic activity of tyrosinase.

58

59 By analyzing the results presented in Figure S6, it is possible to determine that there is no interference  
 60 caused by the TiO<sub>2</sub> nanoparticles on the detection assay for AzA. In Figure S7 the interference caused by  
 61 the presence of inorganic salts when mixed with the TiO<sub>2</sub> nanoparticles is demonstrated by using  
 62 phosphate buffer saline (PBS) and compared to the results using DI-water and a SA solution in water.

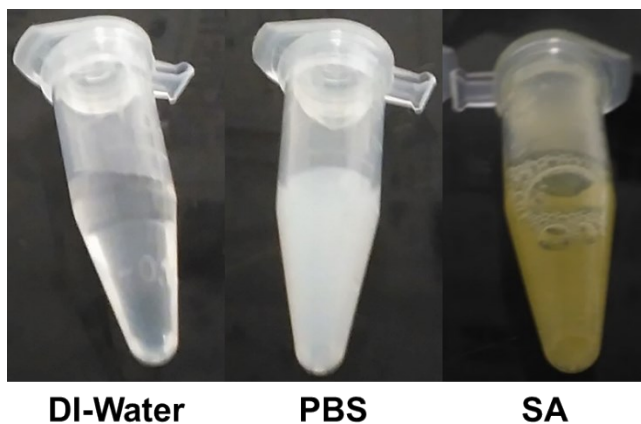

Figure S7 – Result of mixing the TiO<sub>2</sub> nanoparticles with DI-water, PBS and SA. It is important to notice the turbidity caused by the presence of PBS.

63
